# Supplementary material for: Encoder-decoder convolutional neural network for simple CT segmentation of COVID-19 infected lungs
Source: PeerJ journal article supplement (doi:10.7717/peerj-cs.2178), 2024-07-23

### monitor training

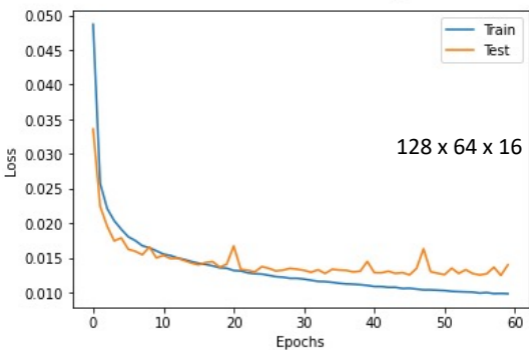

### monitor training

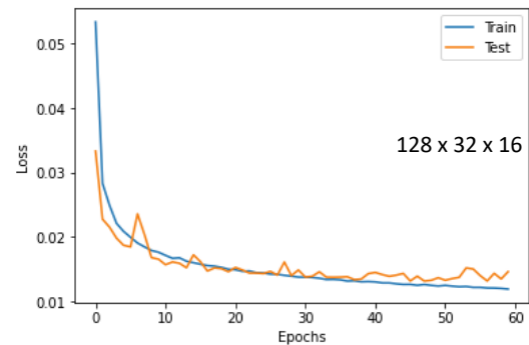

### monitor training

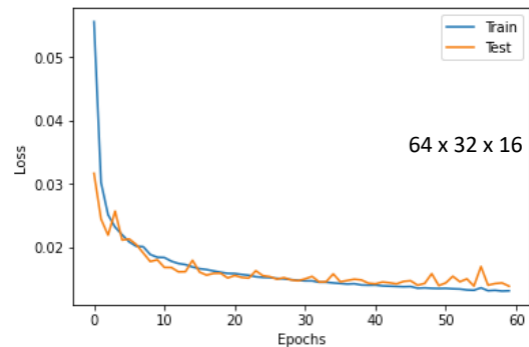

Supplement: FigS1.pdf [file FigS1.pdf]
