# Supplementary material for: Encoder-decoder convolutional neural network for simple CT segmentation of COVID-19 infected lungs
Source: PeerJ journal article supplement (doi:10.7717/peerj-cs.2178), 2024-07-23
Supplement: FigS2.pdf [file FigS2.pdf]

Initial image/orientation Start  
1475 = original training images.

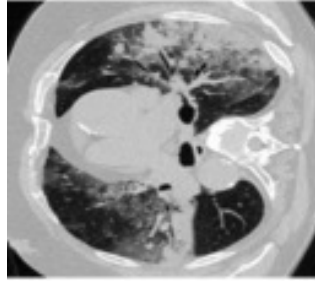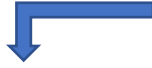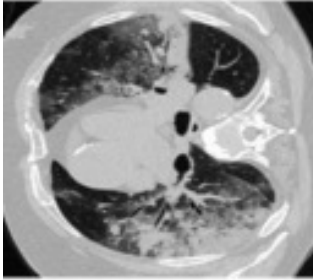

Flipped  
up/down =  
+1475 new  
images.

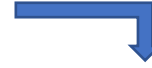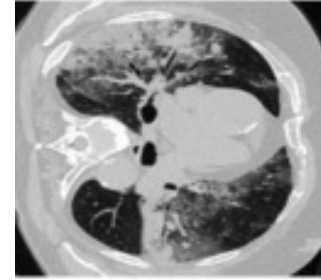

Flipped  
left/right =  
+1475 new  
images.

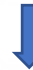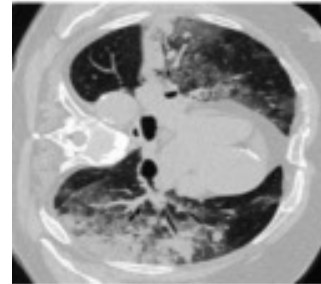

Flipped  
up/down =  
+1475 new  
images.

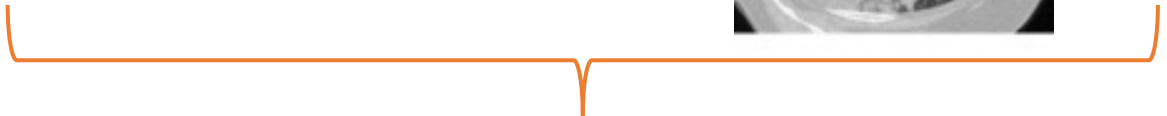

All new images added  
to original training  
dataset.  
End = 5900 images.
